# Supplementary material
Source: PubMed Central journal article supplement (PMC8422679)
Supplement: NIHMS1731955-supplement-Appendix.pdf [file NIHMS1731955-supplement-Appendix.pdf]

---

**Supplementary Appendix:** Tepotinib In Patients With *MET* Exon 14 Skipping Non-Small-Cell Lung Cancer. Paik et al.

***VISION Investigators***

***Biomarker assay methodology***

***Supplemental figures***

Figure S1. Study design

Figure S2. Screening and enrollment

Figure S3. Objective response rate by subgroup

Figure S4. The change in sum of longest diameters between baseline and best post-baseline assessment by investigator assessment (Panel a). Panel b shows the time on treatment in patients with response (n=55), as determined by investigator assessment. Results of a computerized tomography scan for a representative patient at baseline and at Week 6, 12 and 92 of treatment are shown in Panel c

Figure S5. Duration of response by independent review for the three primary analysis populations

Figure S6. Progression-free survival by investigator assessment for the three primary analysis populations

Figure S7. Overall survival for the three primary analysis populations

Figure S8. Patient quality of life on-treatment: Mean change from baseline in patient-reported outcomes for (a) EORTC QLQ-LC13 symptom subscales and (b) EORTC QLQ-C30 global health score and subscales

---

### ***Supplemental tables***

Table S1. Baseline characteristics and clinical characteristics (safety population)

Table S2. Best response to prior treatment (primary analysis population)

Table S3. Response (primary efficacy population)

Table S4. Objective response rate in the overall efficacy population

Table S5. Subsequent treatment (primary analysis population)

Table S6. Adverse events regardless of causality occurring in  $\geq 10\%$  of patients (safety population)

Table S7. Serious adverse events occurring in  $\geq 2\%$  of patients (regardless of causality) and all related serious adverse events (safety population)

Table S8. Treatment-related adverse events leading to dose reductions and treatment discontinuations in  $>1\%$  of patients (safety population)

### ***References***

---

## **VISION Investigators**

**The following investigators participated in the VISION trial:** **Austria:** Richard Greil, Sabine Zoechbauer-Mueller; **Belgium:** Ingel Demedts, Stéphane Holbrechts, Jan Van Meerbeeck; **China:** Gongyan Chen, Ying Cheng, Jian Fang, Zhigang Han, Rui Ma, Jianhua Shi, Yongqian Shu, Jinji Yang, Nong Yang, Jun Zhao; **France:** Acya Bizieux, Thierry Chatellier, Christos Chouaid, Alexis Cortot, Ludovic Doucet, Régine Lamy, Philippe Masson, Julien Mazieres, Sophie Schneider, Helene Senellart, Remi Veillon; **Germany:** Juergen Alt, Christian Gessner, Frank Griesinger, Stefan Hammerschmidt, Sven Henschke, Susanne Lang, Bernd Mross, Sebastian Ochsenreither, Tobias Overbeck, Niels Reinmuth, Harald Schmalenberg, Michael Thomas, Thomas Wehler, Martin Wermke; **Israel:** Maya Gottfried, Ofer Merimsky, Hovav Nechushtan, Nir Peled, Alona Zer Kuch; **Italy:** Clelia Casartelli, Fortunato Ciardiello, Pierfranco Conte, Filippo de Marinis, Adolfo Favaretto, Giovanna Finocchiaro, Marina Chiara Garassino, Maria Rita Migliorino, Federico Rea, Erika Rijavec, Giuseppe Tonini; **Japan:** Shinji Atagi, Kenichi Chikamori, Terufumi Kato, Toshiyuki Kozuki, Toru Kumagai, Shingo Matsumoto, Masahiro Morise, Hiroshi Sakai, Tomohiro Sakamoto, Naofumi Shinagawa, Hiroaki Takeoka, Hiroshi Tanaka, Takaaki Tokito; **Republic of Korea:** Byoung Chul Cho, Eun Kyung Cho, Yoon Ji Choi, Ji-Youn Han, TaeWon Jang, Eun Joo Kang, Jin-Hyoung Kang, Sang-We Kim, Young-Chul Kim, Hyun Woo Lee, Jong-Seok Lee, Young Joo Min, Keunchil Park, Byoung Yong Shim, Choonhee Son, Seung Soo Yoo; **The Netherlands:** Sayed Hashemi, Egbert Smit, Anthonie van der Wekken; **Poland:** Dariusz Kowalski, Slawomir Mandziuk, Wojciech Naumnik, Adam Pawlak, Rodryg Ramlau, Malgorzata Suszko-Kazarnowicz; **Spain:** Rosa Alvarez Alvarez, Carlos Cabrera Galvez, Ana Collazo Lorduy, Javier De Castro, Enriqueta Felip Font, Inmaculada Fernandez Canton, Jose Fuentes Pradera, Gema García Ledo, Maria Pilar Lopez Criado, Irene Moya Horno, Luis Paz-Ares Rodriguez, Edith Rodriguez Braun, Maria Sereno Moyano, Jose Manuel Trigo Perez, David Vicente Baz, Santiago Viteri Ramirez; **Switzerland:** Christian Britschgi, Amina Scherz; **Taiwan:** Gee-Chen Chang, Yuh-Min Chen, Te-Chun Hsia, Chen-Liang Tsai, Chin-

---

Chou Wang, Chih-Hsin Yang; **United States:** Christine Bestvina, Timothy Byun, Juan Daniel Cuevas, David Drew, Bruno Fang, Jhanelle Gray, Harry Harper, Leora Horn, Andrew Horodner, Melissa Johnson, Robert Jotte, Eli Kirshner, Kartik Konduri, Mark Kozloff, Xiuning Le, Jesse Medellin, John Morris, Petros Nikolinakos, Sai-Hong Ignatius Ou, Lindsay Overton, Paul Paik, Jyoti Patel, John Richart, Ravi Salgia, Alexander Spira, Thomas Stanton, Conor Steuer, Kathleen Toomey, James Uyeki, Radhika Walling, Michael Wax, Howard West.

---

### ***Biomarker assay methodology***

*MET* exon 14 skipping was tested centrally from either circulating tumor DNA (ctDNA) collected from plasma (liquid biopsy) using next-generation sequencing panel Guardant360® (73-gene) or from RNA collected from tumor tissue (tissue biopsy) using OncoPrint™ Focus Assay (OFA; 52-gene). Target turnaround time for both assays (liquid or tissue) was 10 working days. The median time for central verification was 10 working days (range: 8 to 14) based on liquid biopsy and 9 working days (range: 7 to 11) for tumor-biopsy based detection.

Central verification of *MET* exon 14 skipping was required prior to study entry; if patients had been previously identified via local testing, they were required to have central verification prior to treatment.

The protocol allowed investigators the freedom to determine the sampling time before enrollment; hence, reflecting testing in real-world practice. Tissue- and liquid-biopsy testing could be done at any stage during the pre-screening period prior to requiring trial treatment. A fresh biopsy sample was not required. For *MET* exon 14 testing on tumor tissue, the sample could be from archival tissue or fresh tissue. Patient blood plasma for liquid biopsy (ctDNA samples) was collected for central testing as soon as the patient was identified as eligible for trial pre-screening. There was no limit on the time between when the biopsy was taken for determination of *MET* exon 14 skipping and trial entry. For tissue samples, the median (range) time from sampling to first dose of tepotinib was 137 days (15–1711).

#### ***Next-generation sequencing panel Guardant360® (73-gene)***

The liquid-biopsy assay was set up to detect changes to the splice acceptor or splice donor region of *MET* exon 14. Any change to genomic DNA occurring in the two regions leads to deletion (skipping) of *MET* exon 14.

---

Specifically, any single-nucleotide variant or Indel variant type that overlaps any of the two splice regions of *MET* exon 14 (chromosome 7:116411902 and 116412043; mapped to the human genome [hg19]) defined as 8 bp into the intron or 3 bp into the exon was identified with the Guardant360<sup>®</sup> assay. Based on the coordinates of these exon–intron junctions, variants found that affect bases 116411894 through 116411905 and 116412040 through 116412051 would be identified as a *MET* exon 14 alteration leading to skipping and thus identified a positive testing result.

Assay sensitivity: *MET* exon 14 skipping detection has a limit of detection of 0.2% mutant allele frequency (MAF) for 30 ng input and 2% MAF for 5 ng input (Guardant Health 360). The sensitivity for other actionable mutations is 0.3% MAF.<sup>1</sup>

Clinical validation using orthogonal plasma- and tissue-based clinical genotyping across >750 patients demonstrated high accuracy and specificity (positive percent agreement and negative percent agreement >99% and positive predictive values 92–100%).<sup>1</sup>

#### *Oncomine™ Focus Assay (OFA; 52-gene)*

The tissue-biopsy assay testing was performed on RNA and demonstrates that, in practice, exon 14 was skipped/deleted. An RT-PCR assay was used, which included primers geared towards the identification of the absence of *MET* exon 14 in a next-generation sequencing read-out of the *MET* mRNA. This is a functional assay directly demonstrating that *MET* exon 14 skipping has occurred at the gene expression level.

Definition of tested regions are based on splice-site definitions in the literature that have shown that these intronic mutations lead to alternative splicing and deletion of *MET* exon 14.<sup>2-6</sup>

Figure S1. Study design

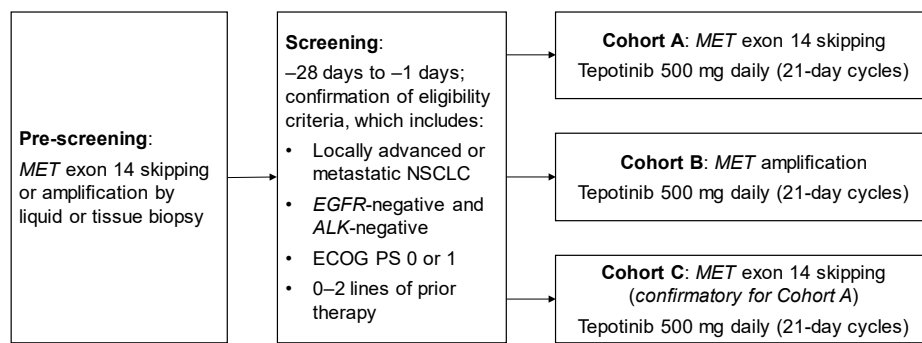

500 mg tepotinib hydrochloride hydrate (active ingredient) contains 450 mg tepotinib free base (active moiety).

ALK, anaplastic lymphoma kinase; ECOG PS, Eastern Cooperative Oncology Group performance status; EGFR, epidermal growth factor receptor; NSCLC, non-small-cell lung cancer.

Figure S2. Screening and enrollment

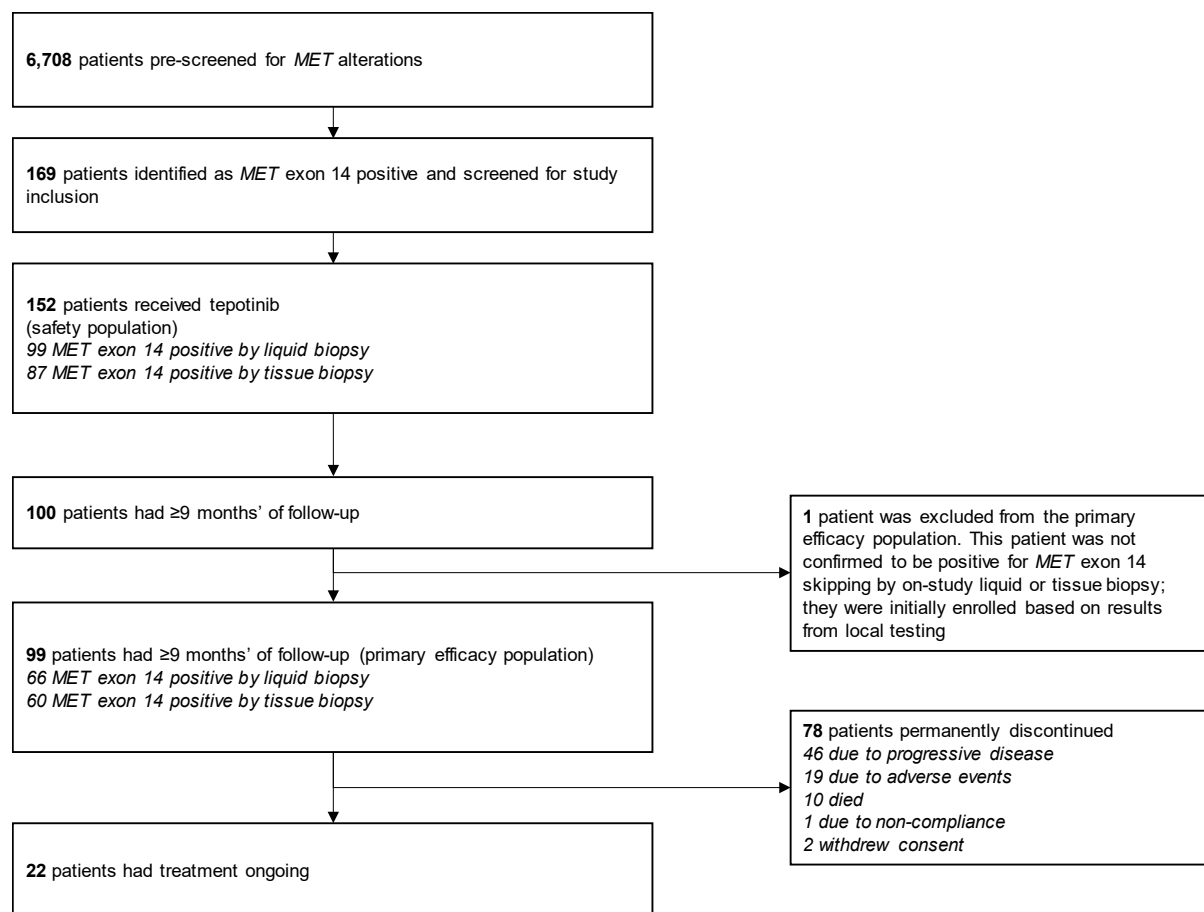



Figure S3. Objective response rate by subgroup

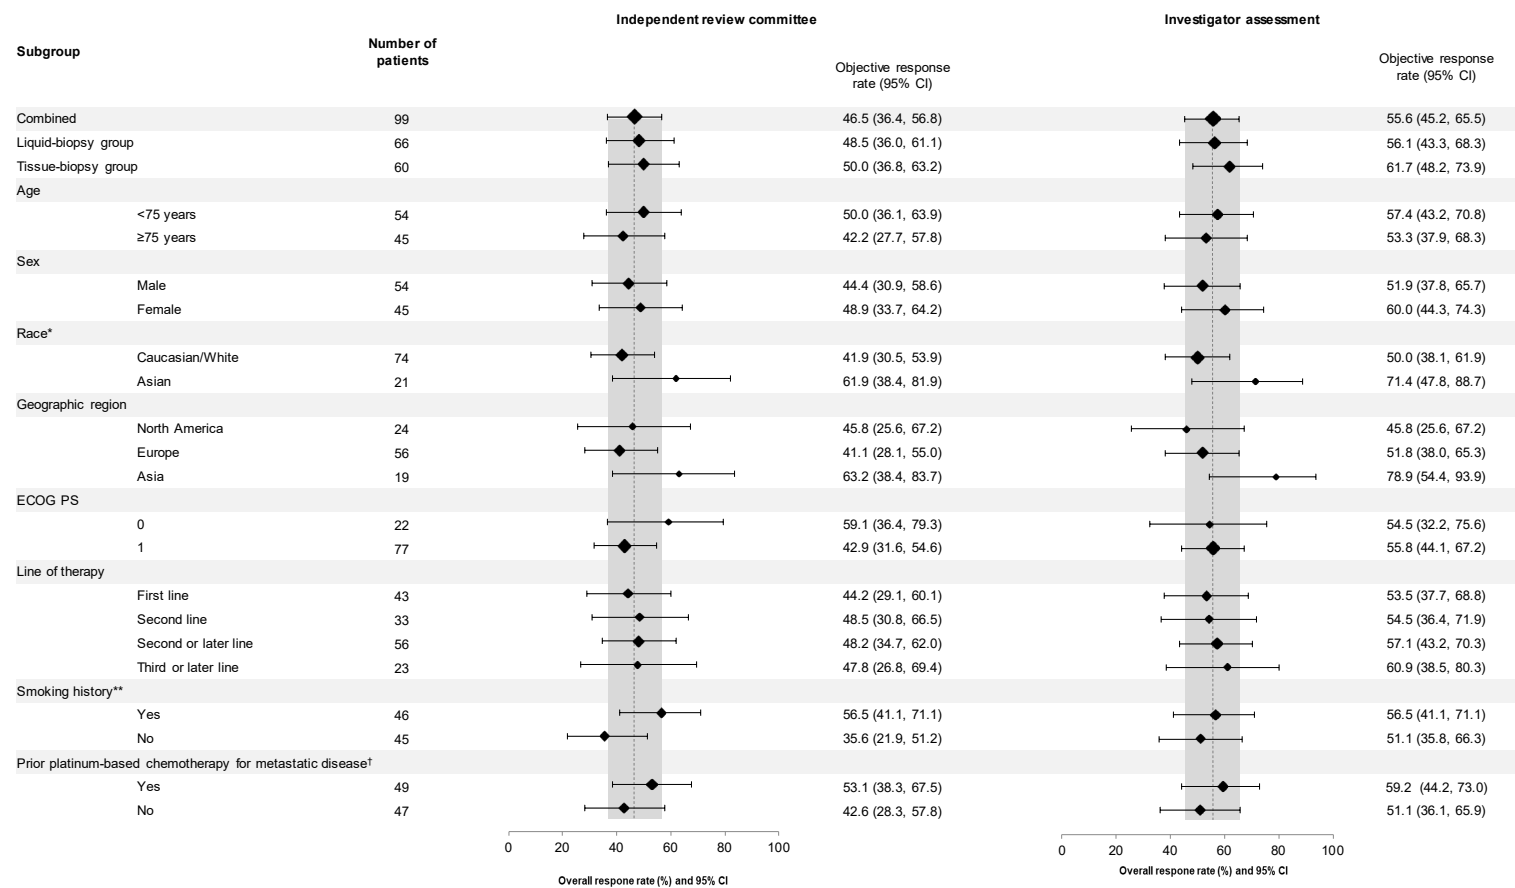

\*Four patients had other race categories; \*\*Eight patients were missing information on smoking history; †Excludes three patients with stage IIIB disease at study entry. CI, confidence interval; ECOG PS, Eastern Cooperative Oncology Group performance status.

Figure S4. The change in sum of longest diameters between baseline and best post-baseline assessment by investigator assessment (Panel a). Panel b shows the time on treatment in patients with response (n=55), as determined by investigator assessment. Results of a computerized tomography scan for a representative patient at baseline and at Week 6, 12 and 92 of treatment are shown in Panel c

(a)

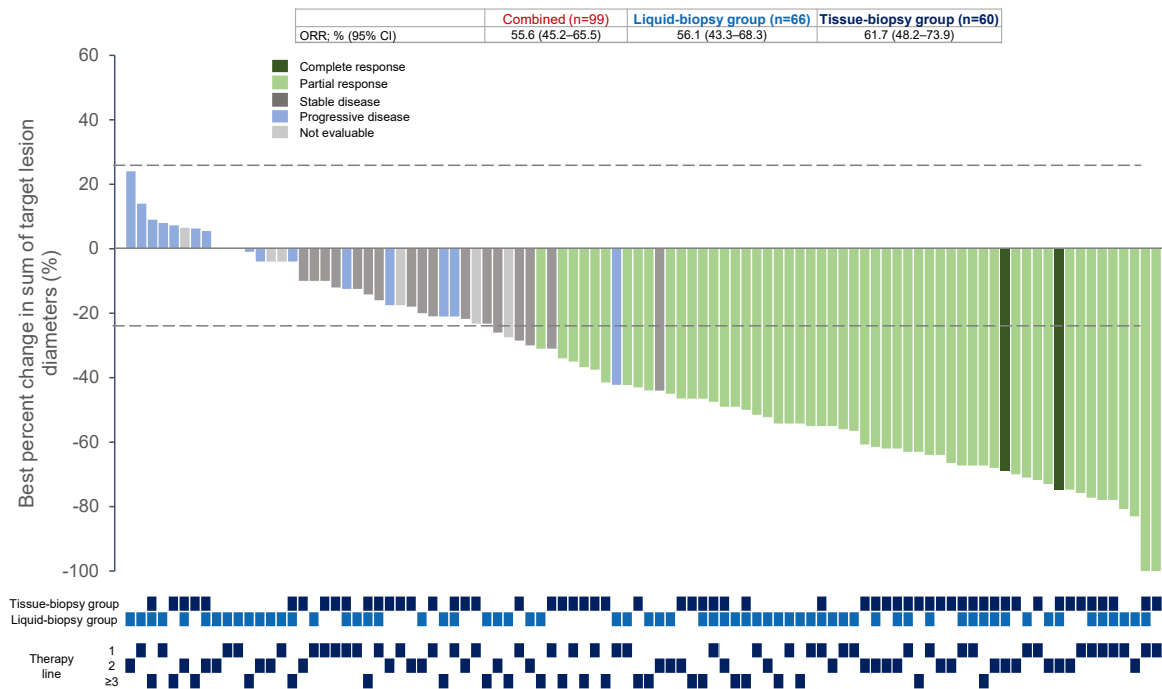

(b)

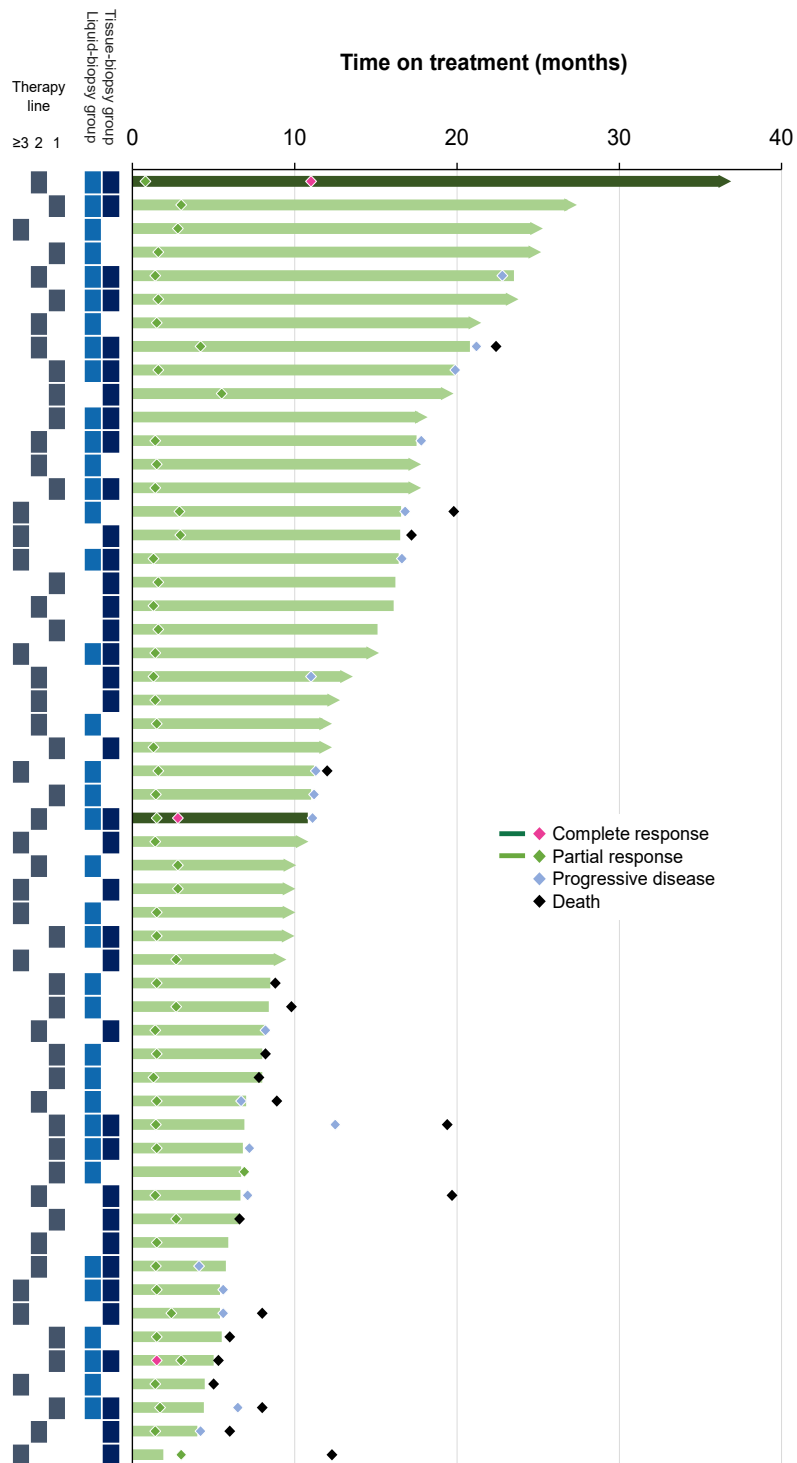

---

(c)

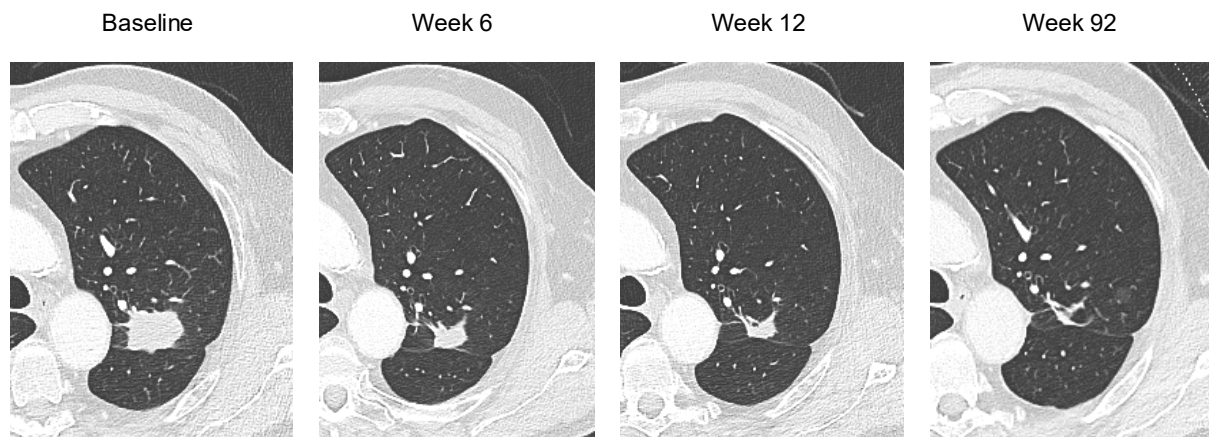

Three patients are not shown in Panel a: two patients did not have baseline/on-treatment measurements not available and one patient requires further evaluation.

CI, confidence interval; ORR, objective response rate.

Figure S5. Duration of response by independent review for the three primary analysis populations

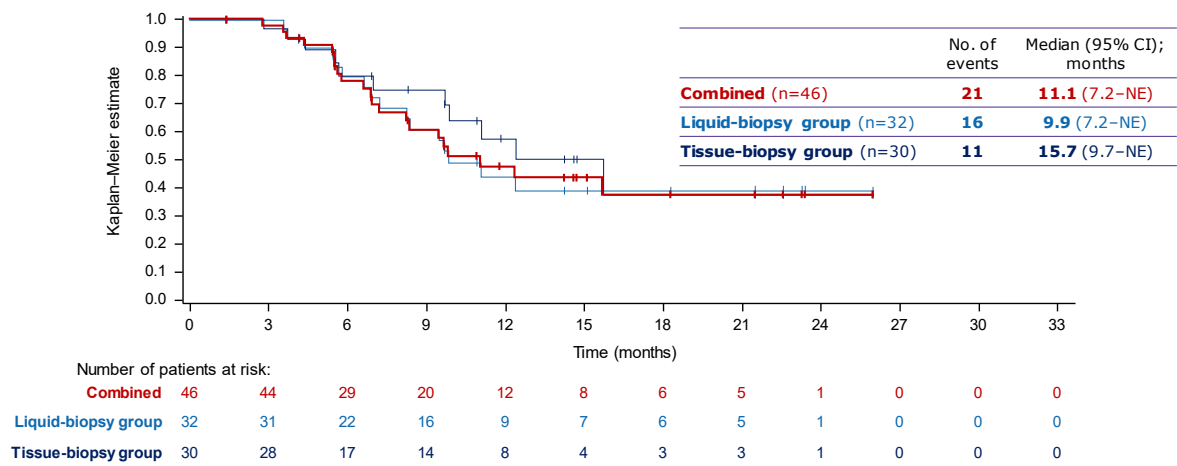

CI, confidence interval; NE, not estimable.

Figure S6. Progression-free survival by investigator assessment for the three primary analysis populations

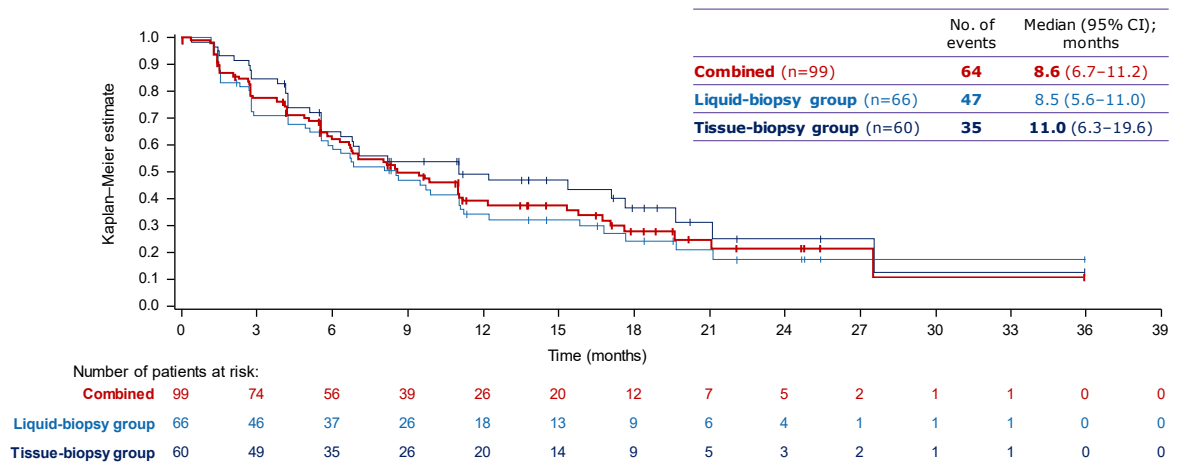

CI, confidence interval.

Figure S7. Overall survival for the three primary analysis populations

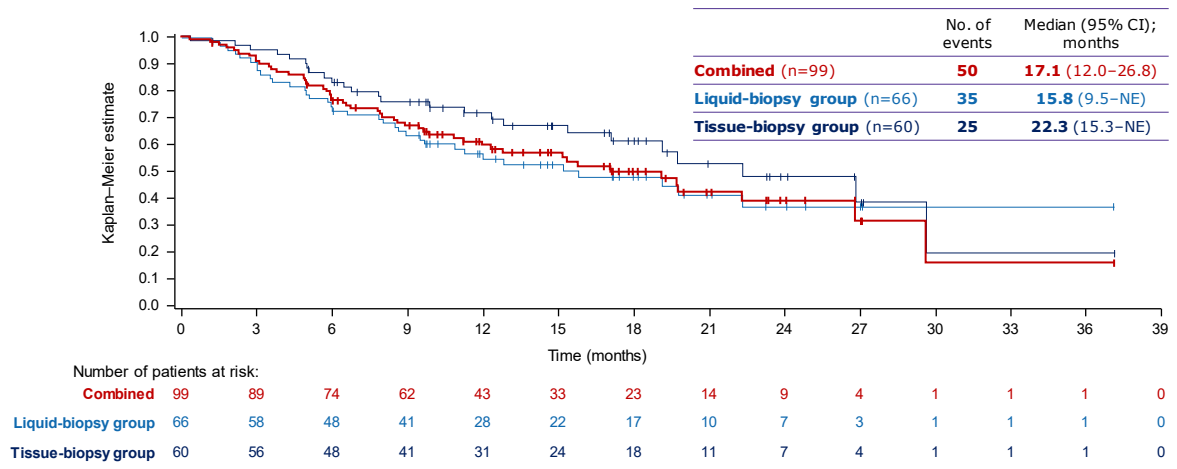

CI, confidence interval; NE, not estimable.

Figure S8. Patient quality of life on-treatment: Mean change from baseline in patient-reported outcomes for (a) EORTC QLQ-LC13 symptom subscales and (b) EORTC QLQ-C30 global health score and subscales

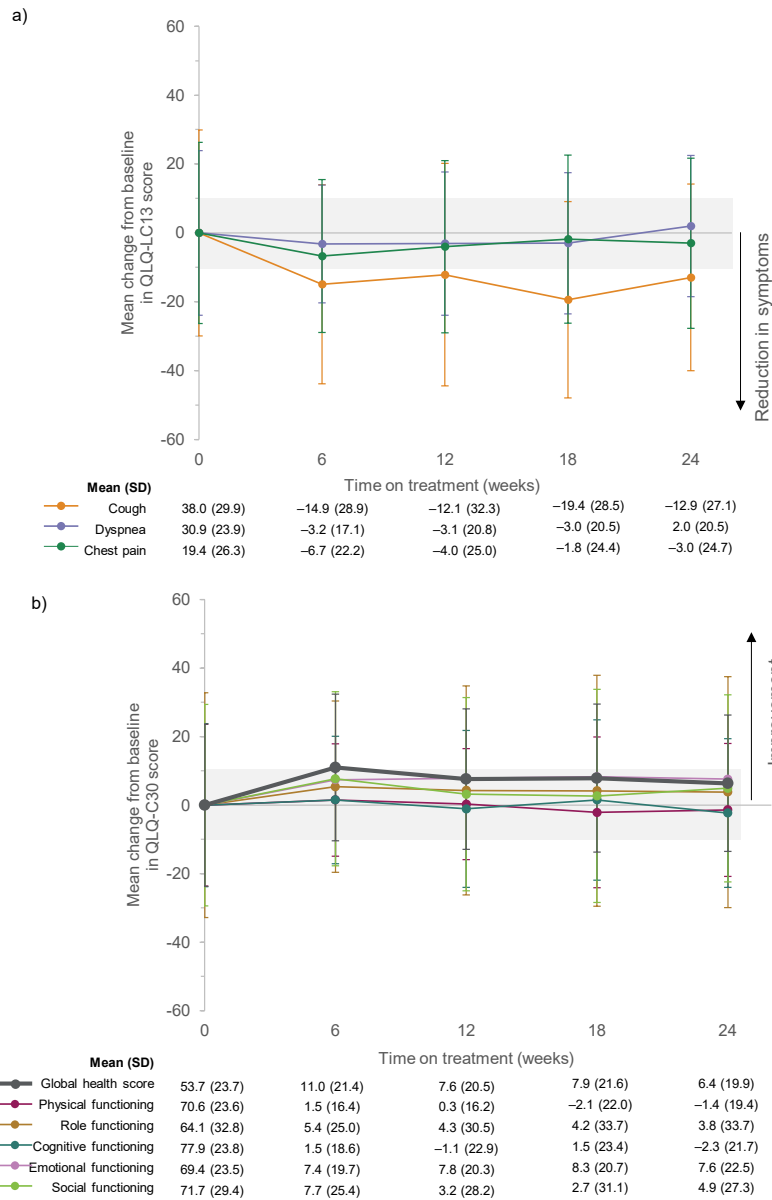

An increase or decrease of >10 points was considered to be clinically meaningful. a) All scores graded out of 100, with lower = better; b) All scores graded out of 100, with higher = better.

SD, standard deviation.



Table S1. Baseline characteristics and clinical characteristics (safety population)

|                                           | <b>Liquid-biopsy group (n=99)</b> | <b>Tissue-biopsy group (n=87)</b> | <b>Combined* (n=152)</b> |
|-------------------------------------------|-----------------------------------|-----------------------------------|--------------------------|
| <b>Median age, years (range)</b>          | 72.4 (49–88)                      | 73.2 (41–94)                      | 73.1 (41–94)             |
| <b>Sex, n (%)</b>                         |                                   |                                   |                          |
| Male                                      | 52 (52.5)                         | 48 (55.2)                         | 79 (52.0)                |
| Female                                    | 47 (47.5)                         | 39 (44.8)                         | 73 (48.0)                |
| <b>Race, n (%)<sup>†</sup></b>            |                                   |                                   |                          |
| Asian                                     | 21 (21.2)                         | 24 (27.6)                         | 38 (25.0)                |
| White                                     | 75 (75.8)                         | 60 (69.0)                         | 108 (71.1)               |
| <b>Smoking history, n (%)<sup>‡</sup></b> |                                   |                                   |                          |
| Yes                                       | 51 (51.5)                         | 44 (50.6)                         | 79 (52.0)                |
| No                                        | 44 (44.4)                         | 35 (40.2)                         | 65 (42.8)                |
| <b>ECOG performance status, n (%)</b>     |                                   |                                   |                          |
| 0                                         | 23 (23.2)                         | 28 (32.2)                         | 41 (27.0)                |
| 1                                         | 76 (76.8)                         | 59 (67.8)                         | 111 (73.0)               |

|                                                                                          |           |           |            |
|------------------------------------------------------------------------------------------|-----------|-----------|------------|
| <b>Histological subtype, n (%)<sup>§</sup></b>                                           |           |           |            |
| Adenocarcinoma                                                                           | 84 (84.8) | 80 (92.0) | 131 (86.2) |
| Squamous                                                                                 | 10 (10.1) | 5 (5.7)   | 14 (9.2)   |
| Sarcomatoid                                                                              | 3 (3.0)   | 0         | 3 (2.0)    |
| <b>Lines of prior therapy for advanced/metastatic disease, n (%)</b>                     |           |           |            |
| 0                                                                                        | 44 (44.4) | 42 (48.3) | 69 (45.4)  |
| 1                                                                                        | 31 (31.3) | 27 (31.0) | 49 (32.2)  |
| 2+                                                                                       | 24 (24.2) | 18 (20.7) | 34 (22.4)  |
| <b>Baseline brain metastases<sup>  </sup> as identified by independent review, n (%)</b> |           |           |            |
|                                                                                          | 11 (11.1) | 6 (6.9)   | 15 (9.9)   |

\*Combined = liquid-biopsy positive and/or tissue-biopsy positive. †Race was unknown or missing in six patients; ‡Smoking history was unknown or missing in eight patients; §Two patients had adenosquamous carcinoma, one patient had carcinoma and one patient had NSCLC not otherwise specified. ||Non-target lesions.

ECOG, Eastern Cooperative Oncology Group; NSCLC, non-small-cell lung cancer.

Table S2. Best response to prior treatment (primary analysis population)

|                                                          | Prior treatment                |                                          |                            |
|----------------------------------------------------------|--------------------------------|------------------------------------------|----------------------------|
|                                                          | Last anticancer therapy (n=57) | Prior platinum-based chemotherapy (n=50) | Prior immunotherapy (n=26) |
| Best response, n (%)                                     |                                |                                          |                            |
| Complete response                                        | 1 (1.8)                        | 2 (4.0)                                  | 0                          |
| Partial response                                         | 10 (17.5)                      | 12 (24.0)                                | 5 (19.2)                   |
| Stable disease                                           | 15 (26.3)                      | 11 (22.0)                                | 7 (26.9)                   |
| Progressive disease                                      | 20 (35.1)                      | 17 (34.0)                                | 9 (34.6)                   |
| Non-complete response/ non-progressive disease           | 1 (1.8)                        | 1 (2.0)                                  | 0                          |
| Not assessable/unknown                                   | 10 (17.5)                      | 7 (14.0)                                 | 5 (19.2)                   |
| Longest duration of response, median (range) months      | 3.0 (1.0–9.0)                  | 4.5 (1.0–13.0)                           | 7.0 (3.0–9.0)              |
| Longest progression-free survival, median (range) months | 3.0 (0–16.0)                   | 3.0 (0–17.0)                             | 3.5 (0–10.0)               |

---

The data in this table include information from the one patient was not included in the primary efficacy population as she was not confirmed to have NSCLC positive for *MET* exon 14 skipping (this patient received prior treatment with the abraxane-carboplatin combination, had a partial response as best response with a duration of response/progression-free survival of 3 months).

Table S3. Response (primary efficacy population)

|                                       | Liquid-biopsy group<br>(n=66) |                     | Tissue-biopsy group<br>(n=60) |                     | Combined*<br>(n=99) |                     |
|---------------------------------------|-------------------------------|---------------------|-------------------------------|---------------------|---------------------|---------------------|
|                                       | IRC                           | INV                 | IRC                           | INV                 | IRC                 | INV                 |
| Best overall response; n (%)          |                               |                     |                               |                     |                     |                     |
| Complete response                     | 0                             | 2 (3.0)             | 0                             | 2 (3.3)             | 0                   | 2 (2.0)             |
| Partial response                      | 32 (48.5)                     | 35 (53.0)           | 30 (50.0)                     | 35 (58.3)           | 46 (46.5)           | 53 (53.5)           |
| Stable disease                        | 11 (16.7)                     | 9 (13.6)            | 11 (18.3)                     | 10 (16.7)           | 19 (19.2)           | 17 (17.2)           |
| Progressive disease                   | 12 (18.2)                     | 15 (22.7)           | 12 (20.0)                     | 8 (13.3)            | 19 (19.2)           | 18 (18.2)           |
| Not evaluable                         | 11 (16.7)                     | 5 (7.6)             | 7 (11.7)                      | 5 (8.3)             | 15 (15.2)           | 9 (9.1)             |
| Objective response rate, % (95% CI)   | 48.5<br>(36.0–61.1)           | 56.1<br>(43.3–68.3) | 50.0<br>(36.8–63.2)           | 61.7<br>(48.2–73.9) | 46.5<br>(36.4–56.8) | 55.6<br>(45.2–65.5) |
| Duration of response, months (95% CI) | 9.9<br>(7.2–NE)               | 14.0<br>(7.3–NE)    | 15.7<br>(9.7–NE)              | 16.4<br>(9.7–NE)    | 11.1<br>(7.2–NE)    | 14.0<br>(9.7– 18.3) |

---

|                 |        |        |        |        |        |        |
|-----------------|--------|--------|--------|--------|--------|--------|
| Disease         | 65.2   | 69.7%  | 68.3   | 78.3%  | 65.7   | 72.7%  |
| control rate, % | (52.4– | (57.1– | (55.0– | (65.8– | (55.4– | (62.9– |
| (95% CI)        | 76.5)  | 80.4)  | 79.7)  | 87.9)  | 74.9)  | 81.2)  |

\*Combined = liquid-biopsy positive and/or tissue-biopsy positive.

CI, confidence interval; INV, investigator assessment; IRC, independent review committee; NE, not estimable.

Table S4. Objective response rate in the overall efficacy population

|                                              | Liquid-biopsy group<br>(n=95) |                     | Tissue-biopsy group<br>(n=84) |                     | Combined<br>(n=146) |                     |
|----------------------------------------------|-------------------------------|---------------------|-------------------------------|---------------------|---------------------|---------------------|
|                                              | IRC                           | INV                 | IRC                           | INV                 | IRC                 | INV                 |
| Objective response rate, % (95% CI)          | 47.4<br>(37.0–57.9)           | 54.7<br>(44.2–65.0) | 45.2<br>(34.3–56.5)           | 58.3<br>(47.1–69.0) | 44.5<br>(36.3–53.0) | 54.8<br>(46.4–63.0) |
| Median duration of response, months (95% CI) | 9.9<br>(7.2–NE)               | 14.0<br>(7.2–NE)    | 12.4<br>(9.7–NE)              | 16.4<br>(9.7–NE)    | 9.9<br>(7.2–NE)     | 14.0<br>(9.7–18.3)  |

Patients evaluable for objective response include those who had at least two post-baseline assessments or discontinued for any reason.

CI, confidence interval; INV, investigator assessment; IRC, independent review committee; NE, not estimable.

Table S5. Subsequent treatment

| N (%)                                                                                   | Liquid-biopsy<br>group<br>(n=66) | Tissue-biopsy<br>group<br>(n=60) | Combined*<br>(n=99) |
|-----------------------------------------------------------------------------------------|----------------------------------|----------------------------------|---------------------|
| <b>Treatment ongoing</b>                                                                | 14                               | 15                               | 22                  |
| <b>Treatment discontinued</b>                                                           | 52                               | 45                               | 77                  |
| <b>Number of patients who<br/>received subsequent<br/>anticancer drug therapy lines</b> | 19                               | 16                               | 27                  |
| <b>Number of subsequent<br/>anticancer drug therapy lines</b>                           |                                  |                                  |                     |
| 1                                                                                       | 13 (19.7)                        | 7 (11.7)                         | 17 (17.2)           |
| 2                                                                                       | 4 (6.1)                          | 8 (13.3)                         | 8 (8.1)             |
| 3                                                                                       | 2 (3.0)                          | 1 (1.7)                          | 2 (2.0)             |
| <b>Agents received</b>                                                                  |                                  |                                  |                     |
| Pembrolizumab                                                                           | 5 (7.6)                          | 6 (10.0)                         | 8 (8.1)             |
| Crizotinib                                                                              | 5 (7.6)                          | 4 (6.7)                          | 7 (7.1)             |
| Docetaxel                                                                               | 2 (3.0)                          | 5 (8.3)                          | 6 (6.1)             |
| Carboplatin                                                                             | 6 (9.1)                          | 5 (8.3)                          | 6 (6.1)             |
| Nivolumab                                                                               | 3 (4.5)                          | 3 (5.0)                          | 5 (5.1)             |
| Ramucirumab                                                                             | 2 (3.0)                          | 3 (5.0)                          | 4 (4.0)             |
| Paclitaxel                                                                              | 3 (4.5)                          | 3 (5.0)                          | 3 (3.0)             |



---

|                                         |         |         |         |
|-----------------------------------------|---------|---------|---------|
| Gemcitabine                             | 2 (3.0) | 1 (1.7) | 2 (2.0) |
| Atezolizumab                            | 2 (3.0) | 1 (1.7) | 2 (2.0) |
| Zoledronic acid                         | 0       | 1 (1.7) | 1 (1.0) |
| Gimeracil/oteracil<br>potassium/tegafur | 0       | 1 (1.7) | 1 (1.0) |

No patients had complete response to subsequent therapy; two patients had a partial response.

\*Combined = liquid-biopsy positive and/or tissue-biopsy positive; one patient was not included in the primary efficacy population as she was not confirmed to have NSCLC positive for *MET* exon 14 skipping (this patient has discontinued treatment and received one subsequent line of treatment with crizotinib).

Table S6. Adverse events regardless of causality occurring in  $\geq 10\%$  of patients (safety population)

| Category, n (%)                    | Tepotinib (n=152) |                |
|------------------------------------|-------------------|----------------|
|                                    | All Grades        | Grade $\geq 3$ |
| Any adverse event                  | 149 (98.0)        | 83 (54.6)      |
| Peripheral edema                   | 106 (69.7)        | 12 (7.9)       |
| Nausea                             | 52 (34.2)         | 2 (1.3)        |
| Diarrhea                           | 47 (30.9)         | 1 (0.7)        |
| Blood creatine increased           | 43 (28.3)         | 1 (0.7)        |
| Hypoalbuminemia                    | 38 (25.0)         | 8 (5.3)        |
| Dyspnea                            | 36 (23.7)         | 4 (2.6)        |
| Constipation                       | 26 (17.1)         | 0 (0.0)        |
| Decreased appetite                 | 26 (17.1)         | 2 (1.3)        |
| Fatigue                            | 26 (17.1)         | 1 (0.7)        |
| Asthenia                           | 23 (15.1)         | 3 (2.0)        |
| Pleural effusion                   | 23 (15.1)         | 9 (5.9)        |
| Vomiting                           | 23 (15.1)         | 2 (1.3)        |
| Cough                              | 21 (13.8)         | 1 (0.7)        |
| Amylase increased                  | 18 (11.8)         | 6 (3.9)        |
| Back pain                          | 18 (11.8)         | 2 (1.3)        |
| Alopecia                           | 17 (11.2)         | 0 (0.0)        |
| Alanine aminotransferase increased | 16 (10.5)         | 6 (3.9)        |

Table S7. Serious adverse events occurring in  $\geq 2\%$  of patients (regardless of causality) and all related serious adverse events (safety population)

| Category, n (%)                       | Tepotinib (n=152) |           |
|---------------------------------------|-------------------|-----------|
|                                       | All causality     | Related   |
| Any serious adverse event             | 73 (48.0)         | 23 (15.1) |
| Pleural effusion                      | 12 (7.9)          | 4 (2.6)   |
| Pneumonia                             | 8 (5.3)           | 0         |
| Disease progression                   | 7 (4.6)           | 0         |
| General physical health deterioration | 7 (4.6)           | 0         |
| Dyspnea                               | 6 (3.9)           | 2 (1.3)   |
| Generalized edema                     | 5 (3.3)           | 4 (2.6)   |
| Acute kidney injury                   | 4 (2.6)           | 2 (1.3)   |
| Pulmonary embolism                    | 4 (2.6)           | 0         |
| Asthenia                              | 3 (2.0)           | 2 (1.3)   |
| Back pain                             | 3 (2.0)           | 0         |
| Edema peripheral                      | 3 (2.0)           | 3 (2.0)   |
| Spinal cord compression               | 3 (2.0)           | 0         |
| Alanine aminotransferase increased    | 2 (1.3)           | 2 (1.3)   |
| Aspartate aminotransferase increased  | 2 (1.3)           | 2 (1.3)   |
| Pneumonitis                           | 2 (1.3)           | 1 (0.7)   |
| Acute respiratory failure             | 1 (0.7)           | 1 (0.7)   |
| Blood creatinine increased            | 1 (0.7)           | 1 (0.7)   |
| Cholecystitis infective               | 1 (0.7)           | 1 (0.7)   |
| Dizziness                             | 1 (0.7)           | 1 (0.7)   |
| Hypersensitivity                      | 1 (0.7)           | 1 (0.7)   |
| Interstitial lung disease             | 1 (0.7)           | 1 (0.7)   |
| Mucosal inflammation                  | 1 (0.7)           | 1 (0.7)   |
| Nausea                                | 1 (0.7)           | 1 (0.7)   |
| Rash maculo-papular                   | 1 (0.7)           | 1 (0.7)   |

Table S8.

Treatment-related adverse events leading to dose reductions and treatment discontinuations in >1% of patients (safety population)

| Category                            | Tepotinib (n=152)                        |                                                        |
|-------------------------------------|------------------------------------------|--------------------------------------------------------|
|                                     | Patients who had a dose reduction; n (%) | Patients who permanently discontinued treatment; n (%) |
| Any treatment-related adverse event | 50 (32.9)                                | 17 (11.2)                                              |
| Peripheral edema                    | 25 (16.4)                                | 7 (4.6)                                                |
| Blood creatinine increased          | 6 (3.9)                                  | 0                                                      |
| General edema                       | 5 (3.3)                                  | 0                                                      |
| Pleural effusion                    | 4 (2.6)                                  | 0                                                      |
| Abdominal pain upper                | 2 (1.3)                                  | 0                                                      |
| Acute kidney injury                 | 2 (1.3)                                  | 0                                                      |
| Alanine aminotransferase increased  | 2 (1.3)                                  | 0                                                      |
| Edema                               | 2 (1.3)                                  | 0                                                      |
| Hypoalbuminemia                     | 2 (1.3)                                  | 0                                                      |
| Genital edema                       | 1 (0.7)                                  | 2 (1.3)                                                |
| Dyspnea                             | 0                                        | 2 (1.3)                                                |
| Pneumonitis                         | 0                                        | 2 (1.3)                                                |

---

## References

1. Odegaard JI, Vincent JJ, Mortimer S, et al. Validation of a plasma-based comprehensive cancer genotyping assay utilizing orthogonal tissue- and plasma-based methodologies. *Clin Cancer Res* 2018;24:3539-49.
2. Awad MM, Oxnard GR, Jackman DM, et al. MET exon 14 mutations in non-small-cell lung cancer are associated with advanced age and stage-dependent MET genomic amplification and c-Met overexpression. *J Clin Oncol* 2016;34:721-30.
3. Frampton GM, Ali SM, Rosenzweig M, et al. Activation of MET via diverse exon 14 splicing alterations occurs in multiple tumor types and confers clinical sensitivity to MET inhibitors. *Cancer Discov* 2015;5:850-9.
4. Comprehensive molecular profiling of lung adenocarcinoma. *Nature* 2014;511:543-50.
5. Paik PK, Drilon A, Fan P-D, et al. Response to MET inhibitors in patients with stage IV lung adenocarcinomas harboring MET mutations causing exon 14 skipping. *Cancer Discov* 2015;5:842-9.
6. Schrock AB, Frampton GM, Suh J, et al. Characterization of 298 patients with lung cancer harboring MET exon 14 skipping alterations. *J Thorac Oncol* 2016;11:1493-502.
